# Supplementary material for: A database of 10 min average measurements of solar radiation and meteorological variables in Ostrava, Czech Republic
Source: Copernicus journal article supplement (doi:10.5194/essd-10-837-2018), 2018-04-25
Supplement: Supplementary file 1 [file Tab. S1 Technical parameters of solar radiation sensors.pdf › Appendix 2/Tab. S1 Technical parameters of solar radiation sensors.pdf]

**Tab. 1 in the Appendix.** Technical parameters of solar radiation sensors.

| type of sensor             | <b>660/730 Sensor</b>                                 | <b>UVA SKU 420</b>                                    | <b>UVB SKU 430</b>                                    | <b>Global radiation sensor EMS 11</b> |
|----------------------------|-------------------------------------------------------|-------------------------------------------------------|-------------------------------------------------------|---------------------------------------|
| company                    | Skye                                                  | Skye                                                  | Skye                                                  | EMS Brno                              |
| bandwidth                  | 620–675 nm; 690–755 nm                                | 315–380 nm                                            | 280–315 nm                                            | 400–1100 nm                           |
| peak                       | 660 nm, 730 nm                                        | 347 nm                                                | 297 nm                                                | 1000 nm                               |
| working range              | < 2000 $\mu\text{mol}/\text{m}^2/\text{s}$            | 0–100 $\text{W}/\text{m}^2$                           | 0–5 $\text{W}/\text{m}^2$                             | 2000 $\text{W}/\text{m}^2$            |
| operating range            | 0–100 %                                               | 0–100 %                                               | 0–100 %                                               | 0–100 %                               |
| operating range            | -35 – +75 °C                                          | -30 – +60 °C                                          | -30 – +60 °C                                          | -20 – +60 °C                          |
| absolute calibration error | < 3%, maximum 5 %                                     | < 3%, maximum 5 %                                     | < 3%, maximum 5 %                                     | max 7%                                |
| cosine error               | 3%                                                    | 3 % (max 5% at 80°)                                   | 3 % (max 5% at 80°)                                   | <10% up to 85°                        |
| linearity                  | <0.2 %                                                | better than 1%                                        | better than 1%                                        | up to 1%                              |
| type of sensor             | <b>Quantum Sensor EMS 12</b>                          | <b>Sensor 510-700 nm</b>                              | <b>Sensor 600-700 nm</b>                              |                                       |
| company                    | EMS Brno                                              | EMS Brno                                              | EMS Brno                                              |                                       |
| bandwidth                  | 400–700 nm                                            | 510–700 nm                                            | 600–700 nm                                            |                                       |
| peak                       | 575 nm                                                | 630 nm                                                | 690 nm                                                |                                       |
| working range              | < 6000 $\mu\text{mol}/\text{m}^2/\text{s}$            | < 6000 $\mu\text{mol}/\text{m}^2/\text{s}$            | < 6000 $\mu\text{mol}/\text{m}^2/\text{s}$            |                                       |
| operating range            | 0–100 %                                               | 0–100 %                                               | 0–100 %                                               |                                       |
| operating range            | -20 – +60 °C                                          | -20 – +60 °C                                          | -20 – +60 °C                                          |                                       |
| absolute calibration error | max 7%                                                | max 7%                                                | max 7%                                                |                                       |
| cosine error               | <10% (85°)                                            | <10% (85°)                                            | <10% (85°)                                            |                                       |
| linearity                  | up to 1% up to 2000 $\mu\text{mol}\cdot\text{s}^{-1}$ | up to 1% up to 2000 $\mu\text{mol}\cdot\text{s}^{-1}$ | up to 1% up to 2000 $\mu\text{mol}\cdot\text{s}^{-1}$ |                                       |

This information was extracted from user's manuals for sensors, or gained directly from the company. Same for the graph with relative spectral sensitivities of sensors.
