# Supplementary material for: A database of 10 min average measurements of solar radiation and meteorological variables in Ostrava, Czech Republic
Source: Copernicus journal article supplement (doi:10.5194/essd-10-837-2018), 2018-04-25
Supplement: Supplementary file [file essd-10-837-2018-supplement-title-page.pdf › essd-10-837-2018-supplement-title-page.pdf]

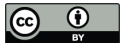

## *Supplement of*

# **A database of 10 min average measurements of solar radiation and meteorological variables in Ostrava, Czech Republic**

**Marie Opálková et al.**

*Correspondence to:* Marie Opálková (opalkovamarie@seznam.cz)

- [essd-10-837-2018-supplement-title-page.pdf](#)
- Appendix 2
  - Fig. S1 Measuring stations at Botanical Garden.jpg
  - Fig. S10 Relative spectral responses of solar radiation sensors.jpg
  - Fig. S2 Location of Botanical Garden - printscreen from GoogleMaps.jpg
  - Fig. S3 Location of Botanical Garden - printscreen from Mapy.cz.jpg
  - Fig. S4 Measuring station at Czech Hydrometeorological Institute area.jpg
  - Fig. S5 Location of Czech Hydrometeorological Institute - printscreen from GoogleMaps.jpg
  - Fig. S6 Location of Czech Hydrometeorological Institute - printscreen from Mapy.cz.jpg
  - Fig. S7 Horizon for the station S1 (BGOU).jpg
  - Fig. S8 Horizon for the station S2 (BGOU).jpg
  - Fig. S9 Horizon for the station S3 (CHMI).jpg
  - Tab. S1 Technical parameters of solar radiation sensors.pdf

The copyright of individual parts of the supplement might differ from the CC BY 4.0 License.
